# Supplementary material for: Comparison of Volatile Constituents Present in Commercial and Lab-Distilled Frankincense (Boswellia carteri) Essential Oils for Authentication
Source: MDPI journal article supplement (doi:10.3390/plants11162134), 2022-08-16
Supplement: s1 [file s1]

**Table S1: Compositional analysis of commercial and lab distilled frankincense (*B. carteri*) essential oils.**

| R.I  | Compounds                                 | F1   | F2   | F3   | F4   | F5   | F6   | F7   | F8   | F9   | F10  | F11  | F12  | F13  | F14  | F15  | F16  | F17  | F18  | F19  | F20  | F21  | F22  | F23  |
|------|-------------------------------------------|------|------|------|------|------|------|------|------|------|------|------|------|------|------|------|------|------|------|------|------|------|------|------|
| 916  | Hashishene                                | 0.1  | 0.2  | 0.1  | 0.1  | t    | t    | 0.2  | 0.2  | 0.2  | 0.4  | t    | 0.1  | 0.2  | 0.1  | 0.1  | 0.1  | 0.2  | t    | t    | 0.2  | t    | 0.4  | 0.4  |
| 921  | Tricyclene                                | 0.1  | 0.1  | 0.1  | 0.1  | 0.1  | 0.1  | 0.1  | 0.1  | 0.1  | 0.1  | 0.1  | t    | t    | 0.1  | 0.1  | t    | 0.1  | 0.2  | 0.1  | 0.1  | 0.1  | 0.1  | 0.1  |
| 924  | $\alpha$ -Thujene                         | 5.6  | 11.0 | 39.4 | 2.2  | 0.4  | 9.5  | 3.4  | 7.3  | 9.2  | 6.7  | 8.9  | 52.9 | 3.4  | 11.1 | 5.5  | 9.0  | 4.4  | 11.6 | 9.4  | 11.0 | 5.4  | 9.1  | 9.2  |
| 931  | $\alpha$ -Pinene                          | 40.3 | 37.2 | 19.1 | 35.5 | 37.9 | 29.0 | 46.4 | 29.2 | 29.8 | 27.8 | 29.8 | 10.6 | 31.0 | 38.8 | 41.9 | 24.1 | 31.1 | 30.6 | 27.4 | 41.2 | 36.8 | 31.8 | 33.3 |
| 942  | Thujadiene                                | 0.1  | 0.1  | 0.4  | 0.1  | t    | t    | t    | 0.1  | 0.1  | t    | 0.1  | 0.3  | 0.1  | 0.1  | 0.1  | 0.3  | 0.1  | t    | 0.1  | t    | 0.1  | 0.6  | 0.7  |
| 945  | $\alpha$ -Fenchene                        | t    | t    | t    | t    | 0.2  | 0.2  | 0.1  | 0.1  | 0.2  | 0.1  | 0.2  | t    | t    | t    | t    | t    | t    | t    | 0.2  | 0.2  | t    | t    | t    |
| 948  | Camphene                                  | 0.4  | 0.6  | 0.2  | 1.1  | 1.7  | 1.5  | 1.2  | 1.3  | 1.4  | 1.0  | 1.4  | 0.2  | 0.8  | 0.4  | 0.4  | 0.4  | 0.9  | 0.7  | 1.5  | 1.4  | 0.4  | 0.7  | 0.8  |
| 954  | Thuja-2,4(10)-diene                       | 0.1  | 0.1  | t    | 0.5  | 0.1  | 0.2  | 0.3  | 0.6  | 0.2  | 0.6  | 0.3  | t    | 0.4  | 0.1  | 0.1  | 0.1  | 0.3  | t    | 0.1  | 0.2  | 0.1  | 0.7  | 0.8  |
| 970  | 3,7,7-Trimethyl-1,3,5-cycloheptatriene    | t    | t    | t    | 0.1  | t    | 0.1  | t    | 0.2  | -    | 0.3  | 0.1  | t    | 0.2  | t    | t    | t    | 0.1  | -    | -    | t    | t    | 0.1  | 0.1  |
| 972  | Sabinene                                  | 6.8  | 4.6  | 4.0  | 4.4  | 5.6  | 4.9  | 3.2  | 2.7  | 5.7  | 4.2  | 4.6  | 8.0  | 3.7  | 4.5  | 6.4  | 5.1  | 3.9  | 4.2  | 5.6  | 5.8  | 2.9  | 3.5  | 3.2  |
| 978  | $\beta$ -Pinene                           | 5.3  | 3.9  | 5.1  | 2.0  | 3.7  | 2.9  | 4.5  | 1.8  | 3.5  | 2.3  | 2.7  | 0.7  | 1.6  | 3.8  | 4.9  | 3.0  | 1.7  | 2.3  | 2.9  | 3.7  | 3.9  | 2.1  | 2.4  |
| 980  | <i>trans</i> -Isolimonene                 | t    | t    | -    | -    | 0.1  | 0.1  | 0.1  | t    | 0.1  | t    | 0.1  | t    | -    | t    | t    | -    | -    | -    | 0.1  | 0.1  | t    | -    | -    |
| 986  | 3- <i>p</i> -Menthene                     | -    | -    | t    | -    | t    | t    | -    | t    | t    | -    | t    | -    | -    | -    | -    | -    | -    | -    | t    | -    | -    | -    | -    |
| 989  | Myrcene                                   | 1.5  | 3.5  | 0.7  | 5.3  | 6.5  | 4.8  | 3.4  | 3.6  | 4.6  | 3.2  | 4.5  | 1.4  | 4.2  | 2.3  | 1.5  | 3.7  | 7.1  | 0.5  | 5.0  | 3.3  | 1.9  | 3.2  | 3.4  |
| 992  | <i>trans</i> -Menthane                    | -    | -    | -    | -    | -    | -    | -    | -    | -    | -    | t    | -    | -    | -    | -    | -    | -    | -    | t    | t    | -    | -    | -    |
| 998  | 2- <i>p</i> -Menthene                     | -    | -    | t    | -    | t    | t    | t    | -    | t    | -    | t    | -    | -    | -    | -    | -    | -    | -    | t    | -    | -    | -    | -    |
| 1003 | <i>para</i> -Mentha-1(7),8-diene          | t    | t    | t    | t    | 0.4  | 0.3  | 0.3  | 0.1  | 0.4  | 0.1  | 0.3  | t    | t    | 0.1  | t    | t    | t    | t    | 0.3  | 0.3  | 0.1  | -    | -    |
| 1007 | 3-Ethenyl-1,2-dimethyl-1,4-cyclohexadiene | -    | -    | -    | 0.1  | -    | -    | -    | 0.2  | -    | 0.1  | -    | -    | -    | -    | -    | -    | -    | -    | -    | -    | -    | 0.2  | 0.2  |
| 1008 | $\alpha$ -Phellandrene                    | 2.4  | 2.6  | 1.9  | 4.1  | 4.3  | 3.0  | 1.8  | 2.2  | 2.3  | 1.9  | 2.8  | 2.5  | 2.1  | 1.8  | 2.3  | 2.2  | 2.6  | t    | 2.3  | 0.7  | 0.8  | 1.6  | 1.4  |
| 1009 | $\delta$ -3-Carene                        | 1.6  | 0.9  | 5.8  | 2.6  | 0.8  | 1.4  | 0.8  | 1.4  | 1.0  | 2.4  | 1.4  | 5.8  | 0.9  | 0.7  | 1.5  | 1.4  | 0.6  | 3.1  | 0.9  | 1.0  | 0.6  | 0.9  | 0.7  |
| 1015 | 1,4-Cineole                               | t    | -    | t    | -    | t    | t    | -    | t    | t    | t    | t    | t    | -    | t    | t    | -    | -    | t    | t    | t    | -    | -    | -    |
| 1016 | $\alpha$ -Terpinene                       | 0.2  | 0.1  | 1.1  | 0.4  | 0.6  | 1.4  | 0.6  | 1.2  | 1    | 1.1  | 1.4  | 0.3  | 0.2  | 0.3  | 0.2  | 0.4  | 0.2  | -    | 0.9  | 0.1  | 0.2  | 0.7  | 0.7  |
| 1019 | <i>m</i> -Cymene                          | t    | t    | 0.1  | t    | t    | t    | t    | t    | t    | t    | t    | 0.1  | t    | t    | t    | t    | t    | 0.2  | t    | t    | t    | 0.1  | 0.1  |
| 1024 | <i>p</i> -Cymene                          | 3.6  | 2.4  | 6.1  | 5.5  | 5.3  | 5.2  | 4.5  | 4.9  | 4.9  | 4.4  | 5.0  | 3.3  | 3.7  | 3.1  | 3.3  | 4.3  | 4.5  | 10.1 | 5.5  | 4.9  | 3.0  | 5.5  | 5.6  |
| 1026 | 2-Acetyl-3-methylfuran                    | t    | t    | 0.1  | -    | -    | t    | -    | -    | -    | -    | -    | 0.4  | -    | t    | -    | 0.1  | t    | 0.2  | -    | -    | -    | -    | t    |
| 1027 | Octyl methyl ether                        | -    | 0.1  | -    | -    | -    | -    | 0.2  | -    | 0.1  | -    | -    | -    | 0.7  | t    | -    | -    | t    | -    | -    | 0.3  | -    | -    | -    |
| 1028 | Limonene                                  | 8.6  | 10.4 | 3.9  | 18.6 | 21.0 | 25.5 | 18.2 | 23.2 | 26.0 | 21.4 | 26.1 | 3.0  | 12.3 | 10.4 | 8.1  | 14.3 | 14.2 | 5.4  | 25.6 | 17.3 | 12.4 | 10.1 | 10.1 |
| 1029 | $\beta$ -Phellandrene                     | 0.1  | 0.3  | 0.7  | 0.4  | 0.1  | 0.1  | 0.2  | 0.3  | 0.2  | t    | -    | 0.7  | 0.5  | 0.2  | t    | -    | 0.1  | 0.1  | 0.3  | 0.2  | 0.1  | 0.4  | 0.4  |
| 1031 | 1,8-Cineole                               | 0.3  | 0.3  | 0.1  | 0.2  | t    | 0.1  | 0.2  | t    | t    | 0.1  | -    | 0.1  | 0.2  | 0.4  | 0.2  | 0.9  | t    | 0.2  | 0.1  | 0.2  | 0.3  | 0.3  | 0.3  |

|      |                              |     |     |     |     |     |     |     |     |     |     |     |     |     |     |     |     |     |     |     |     |     |     |     |
|------|------------------------------|-----|-----|-----|-----|-----|-----|-----|-----|-----|-----|-----|-----|-----|-----|-----|-----|-----|-----|-----|-----|-----|-----|-----|
| 1034 | (Z)- $\beta$ -Ocimene        | t   | 0.3 | 0.2 | 0.1 | t   | 0.1 | 0.1 | 0.2 | 0.1 | 0.4 | 0.1 | 0.7 | 0.1 | 0.1 | t   | 0.1 | 0.2 | 0.1 | 0.1 | 0.1 | 0.1 | 0.3 | 0.3 |
| 1046 | (E)- $\beta$ -Ocimene        | t   | 0.1 | 0.2 | 0.1 | t   | t   | 0.1 | 0.1 | 0.1 | 0.1 | 0.1 | 0.3 | 0.1 | 0.1 | t   | 0.1 | 0.1 | t   | 0.1 | t   | t   | 0.1 | 0.1 |
| 1058 | $\gamma$ -Terpinene          | 0.3 | 0.2 | 2.7 | 0.6 | 0.3 | 0.9 | 0.5 | 1.0 | 0.6 | 1.0 | 0.9 | 0.6 | 0.3 | 0.4 | 0.3 | 0.8 | 0.3 | 0.2 | 0.5 | 0.2 | 0.3 | 1.2 | 1.1 |
| 1069 | 1-Octanol                    | -   | -   | -   | -   | -   | -   | t   | -   | -   | -   | -   | -   | -   | 0.3 | 0.1 | -   | -   | -   | -   | t   | -   | 0.1 | 0.2 |
| 1071 | cis-Sabinene hydrate         | t   | t   | t   | t   | -   | t   | -   | -   | t   | t   | t   | t   | t   | -   | t   | t   | t   | 0.3 | t   | -   | t   | -   | -   |
| 1073 | Pinol                        | t   | t   | t   | t   | -   | t   | t   | 0.1 | t   | 0.1 | t   | t   | t   | -   | -   | t   | t   | -   | t   | t   | 0.1 | t   | 0.1 |
| 1075 | 2-Decyl methyl ether         | -   | -   | -   | -   | -   | -   | -   | -   | -   | -   | -   | -   | t   | -   | -   | -   | -   | -   | -   | -   | t   | -   | -   |
| 1083 | p-Mentha-2,4(8)-diene        | -   | -   | t   | -   | -   | -   | -   | -   | -   | -   | -   | t   | -   | -   | -   | -   | -   | -   | -   | -   | -   | 0.3 | -   |
| 1088 | Terpinolene                  | 0.1 | 0.1 | 2.5 | 0.2 | 0.1 | 0.5 | 0.2 | 0.5 | 0.4 | 0.4 | 0.6 | 0.4 | 0.1 | 0.1 | 0.1 | 0.1 | 0.1 | 0.1 | 0.4 | 0.1 | 0.1 |     | 0.3 |
| 1092 | p-Cymenene                   | t   | t   | t   | 0.1 | t   | 0.2 | 0.1 | 0.5 | 0.1 | 0.4 | 0.2 | t   | 0.1 | 0.1 | 0.1 | 0.1 | 0.1 | t   | t   | 0.1 | 0.1 | 0.3 | 0.3 |
| 1095 | cis-p-Menthenyl methyl ether | -   | -   | t   | -   | -   | -   | -   | -   | -   | -   | -   | -   | -   | -   | -   | -   | -   | 0.1 | -   | -   | -   | -   | -   |
| 1096 | $\alpha$ -Pinene oxide       | 0.1 | -   | -   | -   | -   | -   | -   | t   | -   | t   | t   | t   | -   | 0.1 | 0.1 | -   | -   | -   | -   | 0.2 | -   | -   | -   |
| 1098 | Perillene                    | t   | t   | -   | 0.1 | -   | t   | t   | 0.1 | -   | t   | -   | -   | 0.1 | -   | -   | t   | 0.1 | -   | t   | t   | t   | 0.1 | 0.1 |
| 1099 | Linalool                     | -   | 0.3 | 0.1 | 0.2 | -   | -   | 0.1 | 0.1 | -   | 0.1 | t   | 0.3 | 0.1 | 0.2 | t   | 0.1 | 0.2 | 0.6 | 0.1 | -   | -   | 0.1 | 0.1 |
| 1102 | trans-Sabinene hydrate       | -   | -   | t   | -   | -   | -   | -   | -   | -   | -   | -   | -   | -   | -   | -   | -   | -   | 0.3 | -   | -   | -   | t   | -   |
| 1108 | cis-Thujone                  | -   | -   | t   | t   | -   | -   | -   | -   | -   | t   | -   | t   | -   | -   | -   | -   | 0.1 | 0.3 | -   | -   | -   | t   | t   |
| 1117 | trans-Thujone                | t   | t   | 0.1 | -   | -   | t   | -   | t   | t   | -   | t   | 0.3 | 0.1 | 0.1 | t   | 0.2 | -   | 1.1 | t   | t   | t   | 0.4 | 0.4 |
| 1118 | 3-Octyl acetate              | -   | -   | -   | t   | -   | -   | -   | t   | -   | t   | -   | -   |     | -   | -   | -   | -   | -   | -   | -   | -   | -   | -   |
| 1119 | Myrcenol                     | -   | t   | -   | t   | -   | -   | -   | t   | -   | t   | -   | -   | 0.1 | -   | -   | t   | 0.1 | -   | -   | -   | -   | 0.1 | t   |
| 1122 | trans-p-Mentha-2,8-dien-1-ol | t   | t   | -   | t   | -   | -   | -   | -   | -   | t   | -   | -   | t   | t   | t   | -   | t   | t   | t   | t   | t   | t   | t   |
| 1124 | cis-p-Menth-2-en-1-ol        | -   | -   | t   | t   | -   | -   | -   | -   | -   | t   | t   | t   | t   | -   | -   | t   | t   | -   | -   | -   | -   | 0.1 | t   |
| 1126 | $\alpha$ -Campholenal        | t   | 0.1 | -   | 0.3 | t   | 0.1 | 0.1 | 0.2 | 0.1 | 0.3 | 0.1 | -   | 0.4 | t   | t   | 0.1 | 0.2 | 0.1 | t   | -   | t   | 0.3 | 0.3 |
| 1128 | Methyl nonyl ether           | -   | -   | -   | -   | -   | -   | -   | -   | -   | -   | -   | -   | -   | -   | -   | -   | -   | -   | -   | 0.1 | -   | -   | -   |
| 1129 | 4,5-Epoxy-trans-carene       | -   | -   | -   | t   | -   | t   | -   | t   | -   | 0.1 | t   | -   | t   | -   | -   | t   | -   | -   | -   | -   | -   | 0.1 | 0.1 |
| 1131 | Terpin-3-en-1-ol             | -   | -   | t   | -   | -   | -   | -   | -   | -   | -   | -   | -   | -   | -   | -   | -   | -   | 0.1 | -   | -   | -   | -   | -   |
| 1133 | cis-Limonene oxide           | -   | -   | t   | t   | t   | t   | -   | -   | t   | t   | t   | t   | -   | t   | -   | -   | t   | t   | t   | t   | -   | -   | -   |
| 1137 | cis-p-Mentha-2,8-dien-1-ol   | -   | t   | -   | -   | -   | -   | -   | -   | -   | -   | -   | -   | t   | t   | t   | t   | t   | -   | t   | t   | t   | t   | -   |
| 1138 | trans-Sabinol                | -   | -   | -   | -   | -   | -   | -   | -   | -   | -   | -   | t   | -   | -   | -   | -   | -   | -   | -   | -   | -   | 0.1 | 0.1 |
| 1140 | trans-Pinocarveol            | t   | 0.1 | -   | 0.2 | t   | t   | 0.2 | 0.1 | t   | 0.2 | 0.1 | -   | 0.7 | 0.1 | 0.1 | 0.2 | 0.1 | -   | t   | 0.2 | t   | 0.8 | 0.8 |
| 1142 | trans-p-Menth-2-en-1-ol      | -   | -   | -   | 0.1 | -   | -   | -   | -   | -   | 0.1 | -   | -   | -   | t   | -   | 0.1 | 0.3 | -   | -   | -   | -   | -   | -   |
| 1143 | Epoxyterpinolene             | -   | -   | 0.1 | -   | -   | t   | -   | -   | t   | -   | t   | t   | -   | -   | -   | -   | -   | 0.2 | t   | t   | -   | -   | -   |
| 1145 | Camphor                      | -   | -   | t   | -   | -   | t   | -   | t   | -   | 0.1 | t   | t   | -   | -   | -   | -   | 0.2 | -   | -   | -   | -   | t   | t   |
| 1146 | trans-Verbenol               | -   | t   | -   | -   | -   | -   | 0.1 | -   | -   | -   | -   | -   | 0.6 | t   | 0.1 | 0.2 | -   | -   | -   | 0.1 | -   | 0.4 | 0.5 |
| 1149 | $\alpha$ -Phellandren-8-ol   | t   | 0.1 | -   | 0.2 | t   | t   | 0.1 | 0.1 | 0.1 | 0.3 | t   | -   | 0.3 | 0.1 | 0.1 | 0.1 | 0.4 | -   | t   | 0.1 | 0.1 | 0.3 | 0.3 |

|      |                                |     |     |     |     |     |     |     |     |     |     |     |     |     |     |     |     |     |     |     |     |     |     |     |
|------|--------------------------------|-----|-----|-----|-----|-----|-----|-----|-----|-----|-----|-----|-----|-----|-----|-----|-----|-----|-----|-----|-----|-----|-----|-----|
| 1153 | Sabina ketone                  | -   | -   | -   | t   | -   | -   | -   | -   | -   | t   | -   | -   | t   | -   | -   | t   | t   | t   | -   | t   | -   | t   | t   |
| 1158 | $\beta$ -Pinene oxide          | -   | -   | -   | -   | -   | -   | -   | -   | -   | -   | -   | -   | -   | -   | -   | -   | -   | -   | -   | -   | -   | 0.1 | 0.1 |
| 1159 | <i>trans</i> -Pinocamphone     | t   | t   | -   | 0.1 | t   | t   | 0.1 | 0.1 | 0.1 | 0.2 | t   | -   | 0.1 | t   | t   | t   | 0.1 | -   | t   | t   | t   | 0.1 | 0.1 |
| 1161 | <i>cis</i> -Chrysanthanol      | -   | t   | t   | 0.1 | -   | -   | -   | -   | -   | 0.1 | -   | -   | t   | -   | -   | t   | -   | -   | -   | -   | -   | -   | -   |
| 1163 | Pinocarvone                    | -   | -   | -   | -   | -   | t   | t   | 0.1 | t   | -   | t   | -   | t   | -   | -   | -   | -   | -   | -   | t   | -   | 0.1 | 0.1 |
| 1168 | $\alpha$ -Phellandrene epoxide | -   | -   | -   | -   | -   | -   | -   | -   | -   | -   | -   | 0.1 | -   | -   | -   | -   | -   | -   | -   | t   | -   | 0.2 | 0.2 |
| 1169 | Umbellulone                    | -   | -   | -   | -   | -   | -   | -   | -   | -   | -   | -   | -   | -   | -   | -   | -   | t   | 0.1 | -   | -   | -   | -   | -   |
| 1169 | <i>endo-iso</i> -Camphone      | t   | t   | -   | t   | t   | t   | -   | t   | t   | t   | t   | t   | t   | t   | t   | t   | -   | 0.1 | t   | t   | t   | -   | -   |
| 1170 | Borneol                        | -   | -   | t   | -   | -   | -   | -   | -   | t   | -   | -   | -   | t   | t   | -   | -   | t   | -   | t   | -   | -   | t   | t   |
| 1171 | <i>p</i> -Mentha-1,5-dien-8-ol | 0.1 | 0.3 | t   | 0.4 | t   | 0.1 | 0.2 | 0.3 | 0.1 | 0.7 | 0.1 | -   | 0.6 | 0.1 | 0.1 | 0.3 | 0.3 | -   | t   | -   | 0.1 | 0.9 | 1.0 |
| 1173 | <i>exo-iso</i> -Camphone       | t   | t   | -   | 0.1 | -   | t   | -   | 0.1 | -   | -   | t   | -   | -   | -   | -   | -   | -   | -   | -   | -   | 0.1 | -   | -   |
| 1176 | Verbenyl ethyl ether           | -   | -   | -   | -   | t   | -   | -   | -   | -   | -   | -   | -   | -   | -   | -   | -   | -   | 0.2 | -   | -   | -   | -   | -   |
| 1179 | <i>p</i> -1,8-Menthadien-4-ol  | -   | -   | -   | t   | -   | -   | -   | -   | -   | -   | -   | -   | t   | -   | t   | t   | t   | -   | -   | -   | -   | t   | t   |
| 1180 | Terpinen-4-ol                  | 1.0 | 0.4 | 1.0 | 0.7 | 0.2 | 0.5 | 0.5 | 0.9 | 0.5 | 1.1 | 0.5 | 0.7 | 0.7 | 0.5 | 1.0 | 0.9 | 0.5 | 2.4 | 0.5 | 0.3 | 0.5 | 1.5 | 1.5 |
| 1183 | Thuj-3-en-10-al                | -   | -   | -   | -   | -   | -   | -   | -   | -   | -   | -   | t   | -   | -   | -   | t   | -   | -   | -   | -   | -   | t   | t   |
| 1184 | <i>p</i> -Methylacetophenone   | -   | -   | -   | t   | -   | -   | -   | t   | -   | -   | -   | -   | -   | -   | -   | -   | t   | -   | -   | t   | -   | t   | t   |
| 1187 | <i>p</i> -Cymen-8-ol           | t   | 0.1 | t   | 0.1 | t   | t   | t   | t   | 0.1 | 0.1 | t   | 0.1 | 0.2 | 0.1 | 0.1 | 0.1 | 0.1 | 0.5 | t   | 0.1 | 0.1 | 0.2 | 0.2 |
| 1194 | Myrtenol                       | -   | -   | -   | -   | -   | -   | -   | -   | -   | -   | -   | -   | -   | -   | -   | -   | -   | -   | -   | -   | -   | t   | t   |
| 1195 | $\alpha$ -Terpineol            | 0.5 | 0.3 | 0.2 | 0.5 | 0.1 | 0.2 | 0.4 | 0.6 | 0.2 | 0.6 | 0.2 | t   | 0.5 | 0.3 | 0.5 | 0.4 | 0.4 | 2   | 0.1 | 0.2 | 0.3 | 0.8 | 0.8 |
| 1198 | Methyl chavicol                | t   | 0.1 | 1.8 | -   | -   | 0.2 | 0.1 | 0.1 | 0.3 | 0.2 | 0.2 | 2.2 | -   | 0.1 | t   | 0.1 | -   | 3.8 | 0.3 | 0.1 | 0.1 | -   | -   |
| 1200 | $\gamma$ -Terpineol            | -   | -   | -   | -   | -   | -   | -   | -   | -   | -   | -   | -   | -   | -   | -   | -   | -   | 0.2 | -   | -   | -   | -   | -   |
| 1202 | <i>cis</i> -Sabinol            | -   | -   | -   | -   | -   | -   | t   | -   | -   | -   | t   | 0.1 | -   | t   | t   | 0.1 | -   | -   | -   | t   | -   | 0.1 | 0.1 |
| 1206 | Verbenone                      | 0.1 | 0.2 | -   | 0.3 | t   | 0.1 | 0.1 | 0.2 | 0.1 | 0.4 | 0.1 | t   | 0.4 | 0.1 | 0.1 | 0.2 | 0.3 | 0.1 | 0.1 | 0.2 | 0.2 | 0.5 | 0.5 |
| 1209 | Octyl acetate                  | 4.2 | 5.2 | -   | -   | t   | -   | 0.3 | 0.5 | 0.3 | 0.6 | t   | -   | 0.1 | 4.7 | 3.9 | 0.1 | 0.1 | -   | 0.1 | 0.4 | 7.7 | 0.9 | 1.0 |
| 1218 | <i>trans</i> -Carveol          | -   | -   | -   | -   | -   | -   | t   | -   | -   | -   | -   | -   | 0.1 | t   | t   | t   | -   | -   | -   | t   | -   | 0.2 | 0.2 |
| 1228 | Decyl methyl ether             | 0.2 | 0.3 | -   | -   | t   | -   | 0.7 | t   | 0.4 | 0.2 | -   | -   | 3.0 | t   | 0.2 | t   | 0.1 | -   | 0.1 | 1.2 | 0.1 | -   | -   |
| 1242 | Carvone                        | t   | 0.1 | t   | 0.1 | t   | 0.1 | t   | 0.2 | t   | 0.1 | 0.1 | -   | 0.2 | 0.1 | t   | 0.1 | 0.1 | t   | t   | t   | 0.1 | 0.2 | 0.2 |
| 1243 | Cuminaldehyde                  | t   | t   | t   | t   | t   | t   | t   | 0.1 | t   | 0.1 | t   | -   | -   | t   | -   | t   | t   | t   | t   | t   | t   | 0.1 | 0.1 |
| 1248 | Carvotanacetone                | t   | t   | -   | t   | t   | 0.1 | t   | 0.1 | t   | t   | 0.1 | -   | t   | 0.1 | t   | -   | t   | -   | -   | t   | 0.1 | 0.1 | -   |
| 1252 | Linalyl acetate                | -   | -   | t   | -   | -   | -   | -   | -   | -   | -   | -   | 0.1 | -   | -   | -   | 0.1 | -   | 0.3 | t   | -   | -   | -   | -   |
| 1253 | Piperitone                     | -   | t   | -   | t   | -   | -   | -   | -   | -   | -   | -   | -   | -   | -   | -   | -   | -   | -   | -   | -   | -   | -   | 0.1 |
| 1265 | 3,5-Dimethoxytoluene           | t   | t   | -   | 0.1 | t   | t   | t   | t   | t   | 0.1 | -   | -   | 0.1 | -   | -   | t   | 0.1 | -   | t   | t   | t   | 0.1 | 0.1 |
| 1276 | <i>trans</i> -Ascaridol glycol | -   | -   | -   | -   | -   | t   | -   | -   | -   | -   | -   | t   | -   | -   | -   | -   | -   | 0.1 | t   | t   | -   | -   | -   |
| 1280 | Phellandral                    | t   | t   | -   | t   | -   | t   | t   | 0.1 | t   | 0.1 | t   | -   | t   | t   | t   | t   | t   | -   | t   | -   | t   | 0.1 | t   |

|      |                                        |     |     |     |     |     |     |     |     |     |     |     |     |     |     |     |     |     |     |     |     |     |     |     |
|------|----------------------------------------|-----|-----|-----|-----|-----|-----|-----|-----|-----|-----|-----|-----|-----|-----|-----|-----|-----|-----|-----|-----|-----|-----|-----|
| 1282 | Bornyl acetate                         | 0.1 | 0.3 | t   | 0.5 | t   | 0.1 | 0.2 | 0.4 | 0.1 | 0.4 | 0.1 | t   | 0.4 | 0.2 | 0.1 | 0.3 | 0.3 | 0.1 | 0.1 | 0.1 | 0.2 | 0.5 | 0.5 |
| 1288 | Isobornyl acetate                      | -   | -   | 0.1 | -   | -   | -   | -   | -   | -   | -   | -   | -   | -   | -   | -   | -   | -   | -   | -   | -   | -   | -   | -   |
| 1295 | 1,2,8,9-Diepoxy- <i>p</i> -menthane    | -   | -   | -   | -   | -   | -   | -   | -   | -   | -   | -   | -   | -   | -   | -   | -   | -   | -   | -   | 0.1 | -   | -   | -   |
| 1296 | Carvacrol                              | t   | t   | t   | t   | t   | t   | t   | 0.1 | t   | 0.1 | t   | t   | 0.1 | t   | t   | 0.1 | t   | 0.2 | -   | -   | t   | 0.1 | 0.1 |
| 1326 | 2-(1-Methyl-2-oxopropyl)-cyclohexanone | t   | -   | t   | t   | t   | -   | -   | -   | t   | -   | -   | 0.1 | -   | -   | t   | -   | -   | -   | t   | 0.1 | t   | -   | -   |
| 1331 | Bicycloelemene                         | t   | t   | -   | t   | t   | t   | -   | t   | t   | t   | t   | -   | t   | -   | t   | t   | t   | 0.1 | t   | -   | t   | -   | t   |
| 1346 | $\alpha$ -Terpinyl acetate             | -   | -   | t   | -   | -   | -   | -   | -   | -   | -   | -   | -   | -   | -   | -   | -   | -   | 0.3 | -   | -   | -   | -   | -   |
| 1348 | $\alpha$ -Cubebene                     | 0.1 | 0.1 | -   | 0.2 | -   | 0.1 | t   | 0.1 | 0.1 | 0.1 | 0.1 | 0.1 | 0.4 | 0.1 | 0.1 | 0.3 | 0.2 | -   | 0.1 | t   | 0.2 | 0.3 | 0.3 |
| 1367 | Cyclosativene                          | -   | -   | -   | -   | -   | t   | t   | -   | t   | -   | -   | t   | 0.1 | t   | t   | t   | -   | -   | t   | -   | -   | -   | -   |
| 1368 | $\alpha$ -Ylangene                     | t   | t   | t   | t   | t   | -   | -   | t   | -   | t   | -   | t   | t   | t   | t   | t   | 0.1 | 0.1 | -   | -   | t   | 0.1 | 0.1 |
| 1374 | $\alpha$ -Copaene                      | 0.6 | 0.4 | 0.1 | 0.6 | 0.4 | 0.2 | 0.2 | 0.5 | 0.2 | 0.4 | 0.2 | 0.1 | 1.0 | 0.5 | 0.6 | 0.9 | 0.9 | 0.7 | 0.4 | 0.2 | 0.9 | 0.5 | 0.6 |
| 1376 | Geranyl acetate                        | -   | t   | -   | -   | -   | -   | -   | t   | t   | 0.1 | -   | -   | -   | -   | -   | -   | -   | -   | -   | -   | -   | -   | -   |
| 1381 | $\beta$ -Bourbonene                    | 0.1 | 0.1 | 0.3 | 0.1 | t   | 0.1 | 0.2 | 0.1 | 0.2 | 0.2 | 0.1 | 0.6 | 0.5 | 0.1 | 0.1 | 0.2 | 0.1 | 2.1 | 0.1 | 0.2 | 0.1 | 0.3 | 0.3 |
| 1383 | $\alpha$ -Bourbonene                   | -   | -   | t   | -   | -   | -   | t   | -   | t   | t   | -   | t   | t   | -   | -   | -   | -   | 0.2 | -   | t   | -   | -   | -   |
| 1386 | $\beta$ -Cubebene                      | t   | t   | -   | t   | t   | -   | -   | -   | -   | -   | t   | -   | 0.1 | t   | t   | 0.1 | 0.1 | -   | t   | -   | 0.1 | 0.1 | 0.1 |
| 1388 | $\beta$ -Elemene                       | 0.4 | 0.4 | -   | 1.1 | 0.2 | 0.2 | 0.2 | 0.7 | 0.2 | 0.4 | 0.2 | -   | 1.4 | 0.6 | 0.4 | 0.5 | 0.6 | 0.1 | 0.3 | t   | 0.6 | 0.4 | 0.3 |
| 1399 | $\beta$ -Longipinene                   | -   | -   | -   | -   | -   | -   | -   | -   | -   | -   | -   | 0.1 | -   | -   | -   | -   | -   | 0.3 | -   | -   | -   | -   | -   |
| 1404 | Methyl eugenol                         | -   | -   | 0.1 | -   | -   | t   | -   | -   | t   | -   | -   | 0.1 | -   | -   | -   | -   | -   | 0.5 | t   | -   | -   | -   | -   |
| 1405 | ( <i>Z</i> )- $\beta$ -Caryophyllene   | t   | t   | -   | t   | -   | -   | -   | t   | t   | t   | -   | -   | t   | t   | t   | t   | t   | -   | -   | -   | t   | -   | -   |
| 1406 | $\beta$ -Maaliene                      | t   | t   | -   | t   | t   | t   | -   | t   | -   | -   | -   | t   | 0.1 | t   | t   | 0.1 | -   | -   | t   | -   | t   | -   | -   |
| 1406 | $\alpha$ -Gurjunene                    | -   | -   | -   | -   | -   | -   | -   | -   | t   | t   | t   | -   | -   | -   | -   | -   | 0.1 | -   | -   | -   | -   | 0.1 | 0.1 |
| 1417 | ( <i>E</i> )- $\beta$ -Caryophyllene   | 7.2 | 4.1 | t   | 2.7 | 4.6 | 1.3 | 0.8 | 2.9 | 1.2 | 2.6 | 1.3 | -   | 3.9 | 4.2 | 6.8 | 4   | 3.3 | 0.4 | 1.9 | 0.7 | 5.8 | 1.8 | 1.9 |
| 1419 | $\beta$ -Ylangene                      | -   | -   | t   | -   | -   | -   | -   | -   | -   | -   | -   | 0.1 | -   | -   | -   | -   | -   | 0.2 | -   | -   | -   | -   | -   |
| 1430 | $\gamma$ -Elemene                      | -   | -   | -   | -   | 0.1 | t   | 0.1 | -   | 0.1 | -   | t   | -   | -   | -   | t   | -   | -   | -   | 0.1 | t   | t   | -   | -   |
| 1431 | $\beta$ -Copaene                       | t   | t   | t   | t   | -   | -   | -   | t   | -   | t   | -   | 0.1 | 0.1 | t   | -   | 0.1 | t   | 0.2 | -   | -   | -   | 0.1 | t   |
| 1433 | <i>trans</i> - $\alpha$ -Bergamotene   | 0.3 | t   | t   | 0.1 | 0.6 | 0.1 | 0.1 | 0.1 | 0.1 | 0.1 | 0.1 | 0.1 | 0.1 | 0.1 | 0.3 | 0.1 | 0.1 | 0.2 | 0.2 | 0.1 | 0.5 | 0.1 | 0.1 |
| 1435 | Aromadendrene                          | t   | t   | t   | t   | t   | -   | -   | -   | t   | t   | -   | -   | t   | t   | t   | t   | t   | 0.2 | -   | -   | t   | -   | t   |
| 1443 | 6,9-Guaiadiene                         | -   | t   | -   | -   | -   | -   | t   | t   | t   | 0.1 | -   | -   | t   | t   | -   | -   | t   | -   | -   | t   | -   | 0.1 | 0.1 |
| 1446 | <i>cis</i> -Muurolo-3,5-diene          | t   | t   | -   | 0.1 | t   | t   | -   | -   | -   | 0.1 | -   | -   | -   | -   | -   | -   | -   | t   | t   | -   | -   | -   | -   |
| 1451 | <i>trans</i> -Muurolo-3,5-diene        | -   | -   | -   | -   | t   | -   | -   | 0.1 | -   | -   | t   | -   | 0.1 | 0.1 | t   | 0.2 | t   | -   | t   | -   | t   | 0.1 | 0.1 |
| 1454 | $\alpha$ -Humulene                     | 0.6 | 0.4 | -   | 0.6 | 0.5 | 0.2 | 0.1 | 0.3 | 0.1 | 0.3 | 0.2 | t   | 1.0 | 0.5 | 0.6 | 0.8 | 0.8 | t   | 0.3 | 0.1 | 0.9 | 0.4 | 0.5 |
| 1457 | <i>allo</i> -Aromadendrene             | 0.1 | 0.1 | 0   | 0.2 | t   | t   | t   | 0.1 | t   | 0.1 | t   | t   | 0.3 | 0.1 | 0.1 | 0.2 | 0.2 | 0.1 | 0.1 | t   | 0.1 | 0.1 | 0.1 |
| 1463 | <i>cis</i> -Cadina-1(6),4-diene        | 0.1 | 0.1 | -   | 0.1 | t   | t   | t   | 0.2 | t   | 0.1 | t   | -   | 0.2 | 0.1 | 0.1 | 0.2 | 0.1 | -   | t   | -   | 0.1 | 0.1 | 0.1 |
| 1473 | <i>trans</i> -Cadina-1(6),4-diene      | 0.2 | 0.2 | t   | 0.2 | 0.1 | 0.1 | 0.1 | 0.2 | 0.1 | 0.2 | 0.1 | t   | 0.4 | 0.2 | 0.2 | 0.5 | 0.2 | 0.2 | 0.1 | 0.1 | 0.3 | 0.3 | 0.3 |

|      |                                     |     |     |     |     |     |     |     |     |     |     |     |     |     |     |     |      |     |     |     |     |     |     |     |
|------|-------------------------------------|-----|-----|-----|-----|-----|-----|-----|-----|-----|-----|-----|-----|-----|-----|-----|------|-----|-----|-----|-----|-----|-----|-----|
| 1480 | $\gamma$ -Himachalene               | -   | -   | 0.1 | -   | -   | -   | -   | -   | t   | -   | -   | 0.2 | -   | t   | -   | -    | -   | 0.1 | t   | -   | -   | -   | -   |
| 1484 | Germacrene D                        | 0.2 | 0.2 | 0.1 | 0.2 | 0.3 | 0.1 | t   | 0.1 | 0.1 | 0.1 | t   | 0.2 | 0.4 | t   | 0.2 | 0.4  | 0.2 | -   | 0.1 | t   | 0.3 | 0.1 | 0.1 |
| 1486 | $\delta$ -Selinene                  | t   | t   | -   | t   | t   | t   | -   | 0.1 | -   | -   | t   | -   | 0.1 | t   | t   | 0.1  | t   | -   | t   | -   | 0.1 | 0.1 | 0.1 |
| 1487 | $\beta$ -Selinene                   | 0.2 | 0.2 | -   | 0.3 | 0.1 | 0.1 | 0.1 | 0.3 | 0.1 | 0.2 | 0.1 | t   | 0.7 | 0.3 | 0.2 | 0.3  | 0.2 | -   | 0.1 | t   | 0.3 | 0.3 | 0.2 |
| 1490 | Viridiflorene                       | -   | -   | -   | -   | -   | -   | 0.1 | 0.2 | 0.1 | 0.3 | -   | -   | -   | -   | -   | -    | -   | -   | -   | -   | -   | -   | -   |
| 1492 | <i>trans</i> -Muurolo-4(14),5-diene | 0.1 | 0.1 | -   | 0.1 | t   | t   | -   | -   | -   | -   | -   | -   | 0.3 | 0.1 | 0.1 | 0.3  | 0.1 | -   | 0.1 | t   | 0.1 | 0.2 | 0.2 |
| 1498 | $\alpha$ -Selinene                  | 0.2 | 0.2 | -   | 0.3 | 0.1 | 0.1 | 0.1 | 0.2 | 0.1 | 0.1 | 0.1 | -   | 0.7 | 0.2 | 0.2 | 0.4  | 0.3 | -   | 0.1 | t   | 0.3 | 0.3 | 0.3 |
| 1501 | $\alpha$ -Muuroloene                | 0.1 | 0.1 | t   | 0.1 | 0.1 | t   | t   | 0.1 | t   | 0.1 | 0.1 | t   | 0.3 | 0.1 | 0.1 | 0.3  | 0.1 | t   | 0.1 | t   | 0.2 | 0.2 | 0.2 |
| 1508 | $\beta$ -Bisabolene                 | 0.1 | -   | t   | -   | 0.4 | 0.1 | t   | 0.1 | t   | t   | 0.1 | -   | -   | t   | 0.1 | t    | -   | t   | t   | t   | 0.1 | -   | -   |
| 1514 | $\gamma$ -Cadinene                  | 0.3 | 0.2 | t   | 0.4 | 0.1 | 0.1 | 0.1 | 0.3 | 0.1 | 0.3 | 0.1 | t   | 0.7 | 0.3 | 0.3 | 0.7  | 0.3 | 0.1 | 0.1 | t   | 0.4 | 0.4 | 0.4 |
| 1516 | Cubebol                             | -   | 0.1 | -   | t   | -   | -   | -   | -   | -   | -   | -   | -   | 0.2 | -   | 0.1 | 0.1  | -   | -   | -   | -   | -   | 0.1 | 0.1 |
| 1520 | <i>trans</i> -Calamenene            | t   | -   | -   | t   | -   | -   | -   | t   | t   | t   | -   | t   | 0.1 | 0.1 | 0.1 | t    | t   | t   | t   | t   | 0.1 | 0.1 | -   |
| 1521 | $\delta$ -Cadinene                  | 0.7 | 0.5 | t   | 0.7 | 0.2 | 0.3 | 0.2 | 0.8 | 0.2 | 0.6 | 0.3 | 0.1 | 1.7 | 0.8 | 0.7 | 1.6  | 0.9 | 0.1 | 0.4 | 0.1 | 1.1 | 0.9 | 0.8 |
| 1523 | Zonarene                            | t   | -   | -   | t   | -   | t   | t   | 0.1 | t   | 0.1 | t   | -   | 0.1 | t   | t   | t    | t   | -   | t   | -   | -   | 0.1 | t   |
| 1529 | Kessane                             | -   | -   | 0.1 | -   | -   | t   | -   | -   | t   | t   | t   | 0.2 | -   | t   | -   | -    | -   | 0.5 | t   | t   | -   | -   | -   |
| 1532 | <i>trans</i> -Cadine-1,4-diene      | t   | t   | -   | t   | t   | t   | -   | 0.1 | t   | t   | t   | -   | 0.1 | t   | t   | 0.1  | t   | -   | t   | -   | t   | 0.1 | 0.1 |
| 1537 | $\alpha$ -Cadinene                  | t   | t   | -   | t   | t   | t   | -   | t   | t   | t   | t   | -   | 0.1 | t   | t   | 0.1  | t   | -   | t   | -   | t   | t   | t   |
| 1539 | $\alpha$ -Calacorene                | t   | t   | -   | t   | -   | t   | -   | 0.1 | t   | t   | t   | -   | t   | t   | t   | t    | t   | -   | t   | -   | 0.1 | t   | t   |
| 1548 | Elemicin                            | -   | -   | -   | -   | -   | -   | -   | -   | -   | -   | -   | -   | -   | -   | -   | -    | -   | 0.2 | -   | -   | -   | -   | -   |
| 1549 | $\alpha$ -Elemol                    | t   | t   | -   | t   | -   | t   | t   | 0.1 | t   | 0.1 | t   | -   | 0.2 | 0.1 | t   | 0.1  | t   | -   | t   | -   | -   | 0.1 | 0.1 |
| 1560 | Germacrene B                        | t   | -   | -   | -   | t   | t   | -   | -   | -   | -   | -   | -   | -   | -   | t   | -    | -   | -   | -   | -   | t   | -   | -   |
| 1560 | $\beta$ -Calacorene                 | t   | t   | -   | t   | -   | -   | -   | t   | -   | -   | t   | -   | 0.1 | t   | t   | t    | t   | -   | t   | -   | 0.1 | -   | -   |
| 1567 | Palustrol                           | t   | t   | -   | t   | -   | t   | -   | t   | t   | t   | t   | -   | t   | t   | t   | t    | -   | -   | -   | -   | t   | t   | t   |
| 1577 | Caryophyllene oxide                 | 0.8 | 0.5 | -   | 0.5 | 0.2 | 0.3 | 0.1 | 0.5 | 0.1 | 0.5 | 0.3 | t   | 1.0 | 0.5 | 0.7 | 0.9  | 0.6 | 1.0 | 0.3 | 0.2 | 1.2 | 0.9 | 1.0 |
| 1578 | Spathulenol                         | t   | 0.1 | -   | t   | t   | t   | -   | t   | t   | t   | t   | -   | 0.1 | t   | t   | 0.1  | t   | -   | t   | -   | 0.1 | 0.1 | 0.1 |
| 1585 | Ethyl isopropyl phthalate           | -   | -   | -   | -   | -   | -   | -   | -   | -   | -   | -   | -   | -   | -   | -   | -    | -   | 0.1 | -   | -   | -   | -   | -   |
| 1592 | Viridiflorol                        | -   | 0.4 |     | t   | t   | t   | 0.5 | 0.8 | 0.5 | 2.1 | t   | -   | 0.3 | 0.1 | 0.1 | 0.2  | 0.1 |     | t   | 0.1 | 0.1 | 1.1 | 0.7 |
| 1605 | Ledol                               | t   | -   | -   | -   | -   | -   | -   | t   | t   | t   | t   | -   | t   | t   | t   | t    | -   | -   | -   | -   | t   | t   | t   |
| 1612 | Humulene epoxide II                 | 0.1 | 0.1 |     | 0.1 | t   | t   | t   | 0.1 | t   | 0.1 | t   | -   | 0.2 | 0.1 | 0.1 | 0.1  | 0.1 | t   | t   | t   | 0.2 | 0.3 | 0.3 |
| 1616 | 1,10-di- <i>epi</i> -Cubenol        | 0.1 | -   | -   | -   | -   | t   | t   | 0.1 | -   | 0.1 | 0.1 | -   | -   | -   | -   | 0.1  | 0.1 | -   | -   | -   | 0.2 | 0.1 | 0.1 |
| 1626 | 1- <i>epi</i> -Cubenol              | t   | t   | -   | t   | t   | t   | -   | 0.1 | t   | 0.1 | t   | -   | 0.1 | t   | t   | 0.1  | t   | -   | t   | -   | 0.1 | 0.1 | 0.1 |
| 1640 | <i>epi</i> - $\alpha$ -Cadinol      | 0.3 | 0.2 | -   | 0.3 | t   | 0.2 | 0.1 | 0.5 | 0.1 | 0.5 | 0.3 | -   | 0.8 | 0.4 | 0.4 | 0.94 | 0.2 | -   | 0.1 | t   | 0.6 | 0.8 | 0.9 |
| 1644 | $\delta$ -Cadinol                   | t   | t   | -   | -   | -   | t   | -   | -   | -   | -   | t   | -   | t   | t   | t   | t    | -   | -   | -   | -   | 0.1 | t   | t   |
| 1655 | $\alpha$ -Cadinol                   | 0.1 |     | -   | -   | t   | -   | -   | -   | t   | -   | 0.1 | -   | 0.2 | 0.1 | 0.1 | 0.2  | t   | -   | -   | t   | 0.2 | -   | -   |

|      |                                       |     |     |   |     |     |     |     |     |     |     |     |     |     |     |     |     |     |     |     |     |     |     |     |
|------|---------------------------------------|-----|-----|---|-----|-----|-----|-----|-----|-----|-----|-----|-----|-----|-----|-----|-----|-----|-----|-----|-----|-----|-----|-----|
| 1657 | $\alpha$ -Eudesmol                    | -   | t   | - | 0.1 | -   | t   | t   | 0.1 | -   | 0.1 | -   | -   | -   | -   | -   | -   | -   | t   | -   | -   | 0.2 | 0.2 |     |
| 1793 | $\alpha$ -Phellandrene dimer          | t   | -   | t | 0.1 | t   | t   | 0.1 | -   | -   | -   | t   | t   | 0.2 | 0.1 | 0.1 | 0.1 | t   | 0.2 | t   | t   | 0.1 | 0.1 | 0.1 |
| 1946 | $\alpha$ -Springene                   | t   | t   | - | t   | t   | t   | t   | t   | t   | t   | t   | -   | -   | t   | t   | 0.1 | 0.1 | 0.1 | t   | t   | 0.1 | -   | -   |
| 1950 | (3E)-Cembrene A                       | 0.1 | 0.1 | t | 0.1 | t   | t   | t   | 0.1 | t   | 0.1 | t   | t   | 0.4 | 0.1 | 0.1 | 0.2 | 0.1 | 0.2 | 0.1 | t   | 0.1 | 0.1 | 0.1 |
| 1977 | <i>p</i> -Camphorene                  | -   | t   | - |     | t   | t   | -   | -   | t   | -   | -   | -   | -   | t   | t   | t   | 0.1 | t   | t   | t   | t   | -   | -   |
| 1992 | A-Pinacene (= Cembrene C)             | t   | t   | - | t   | -   | -   | -   | t   | -   | t   | -   | -   | 0.1 | t   | t   | t   | t   | -   | t   | -   | t   | t   | -   |
| 1993 | Olealdehyde                           | -   | -   | - | -   | -   | -   | 0.3 | -   | -   | -   | -   | -   | -   | -   | -   | -   | -   | -   | -   | -   | -   | -   | -   |
| 2012 | Verticilla-4(20),7,11-triene          | t   | t   | t | t   | t   | t   | t   | 0.1 | t   | t   | t   | t   | 0.1 | t   | t   | 0.1 | t   | 0.1 | t   | t   | 0.1 | 0.1 | t   |
| 2057 | Ricinelaidic acid lactone             | -   | -   | - | -   | -   | -   | -   | -   | -   | -   | t   | t   | -   | -   | -   | -   | -   | -   | t   | 0.1 | -   | -   | -   |
| 2123 | Cembrenol                             | 0.1 | 0.1 |   | t   | t   | t   | t   | 0.1 | t   | 0.1 | t   | t   | 0.2 | 0.2 | 0.1 | 0.1 | t   | 0.2 | t   | t   | 0.3 | 0.1 | 0.1 |
| 2143 | Verticillatriene isomer               | -   | -   | - | 0.2 | 0.4 | -   | -   | 0.5 | 0.2 | 0.9 | -   | -   | -   | -   | -   | -   | -   | -   | -   | -   | -   | -   | -   |
| 2145 | Serratol                              | 1.0 | 0.5 | t | -   | -   | 0.1 | 0.3 | -   | -   | -   | 0.2 | 0.1 | 2.1 | 1.6 | 1.6 | 1.7 | 0.3 | 1.3 | 0.2 | 0.1 | 1.7 | 0.7 | 0.7 |
| 2146 | Incensole                             | -   | 0.1 | - | -   | -   | -   | 0.1 | -   | -   | -   | -   | -   | -   | -   | -   | -   | -   | -   | -   | -   | -   | 0.2 | 0.1 |
| 2149 | Incensyl acetate                      | t   | 0.2 | - | t   | t   | t   | -   | t   | -   | -   | -   | -   | -   | 0.3 | -   | t   | -   | -   | t   | -   | -   | -   | -   |
| 2260 | (9Z)-Eicosen-1-ol                     | -   | -   | - | -   | -   | -   | 0.1 | -   | -   | -   | -   | -   | -   | -   | -   | -   | -   | -   | -   | -   | -   | -   | -   |
| 2264 | <i>iso</i> -Incensyl acetate          | -   | t   | - | -   | -   | -   | -   | -   | -   | -   | -   | -   | -   | t   | -   | -   | -   | 0.1 | -   | -   | t   | -   | -   |
| 2257 | Incensole oxide                       | -   | -   | - | -   | -   | -   | -   | -   | -   | -   | -   | -   | -   | -   | t   | -   | -   | t   | -   | -   | t   | -   | -   |
| 2330 | Copalic acid                          | -   | -   | - | -   | -   | -   | -   | -   | -   | -   | -   | -   | -   | -   | t   | -   | -   | -   | -   | -   | -   | -   | -   |
| 2400 | Tetracosane                           | -   | -   | - | -   | -   | -   | -   | -   | -   | -   | -   | -   | -   | -   | -   | -   | -   | -   | -   | -   | -   | 0.5 | -   |
| 2464 | (13Z)-Docosen-1-ol                    | -   | -   | - | -   | -   | -   | 0.3 | -   | -   | -   | -   | -   | -   | -   | -   | -   | -   | -   | -   | -   | -   | -   | -   |
| 2678 | Methyl commate isomer                 | -   | -   | - | -   | -   | -   | -   | -   | -   | -   | -   | -   | -   | -   | -   | -   | 7.1 | -   | -   | -   | -   | -   | -   |
| 2792 | Methyl commate B                      | -   | 0.9 | - | 0.1 | -   | -   | -   | -   | -   | -   | -   | 0.3 | -   | -   | -   | -   | -   | -   | -   | -   | -   | -   | -   |
| 2793 | 24- <i>nor</i> -Ursa-3,12-dien-11-one | -   | -   | - | -   | -   | -   | -   | -   | -   | -   | -   | -   | -   | -   | -   | -   | -   | -   | 0.7 | -   | -   | -   | -   |

“-” indicates not detected and “t” indicate trace ( $\leq 0.05\%$ ).
